# Supplementary material for: Production and characterization of specific monoclonal antibodies binding the Plasmodium falciparum diagnostic biomarker, histidine-rich protein 2
Source: PubMed Central journal article supplement (PMC4120728; doi:10.1186/1475-2875-13-277), 2014-07-18

Supplement 3

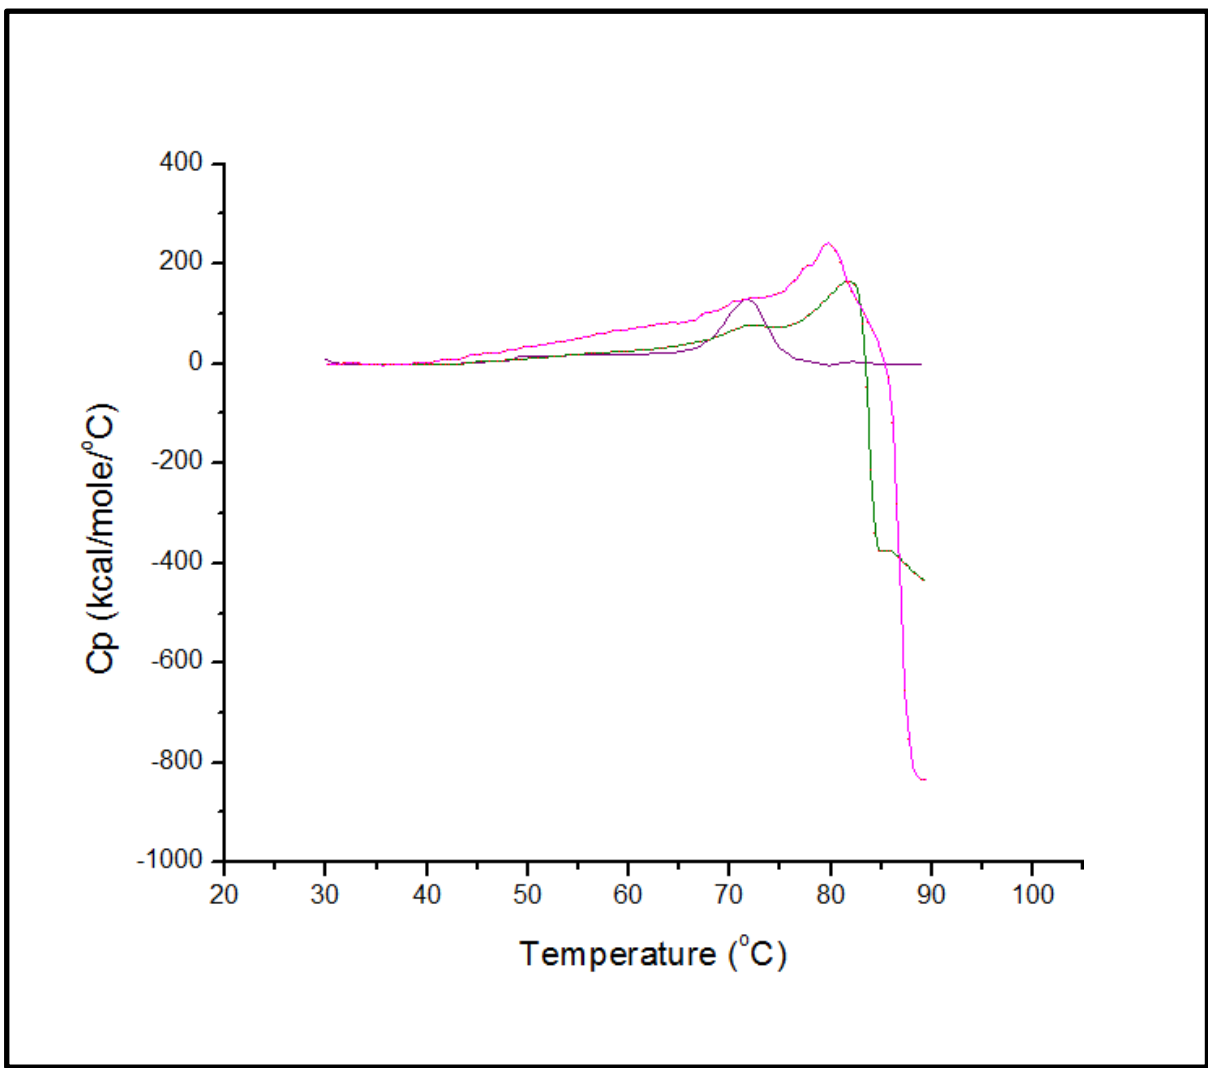

Supplement: 1475-2875-13-277-S3.pdf [file 1475-2875-13-277-S3.pdf]
